# Supplementary material for: The Effect of PCL Addition on 3D-Printable PLA/HA Composite Filaments for the Treatment of Bone Defects
Source: MDPI journal article supplement (doi:10.3390/polym14163305), 2022-08-13
Supplement: s1 [file s1]

# The Effect of PCL Addition on 3D-Printable PLA/HA Composite Filaments for the Treatment of Bone Defects

Elin Åkerlund <sup>1</sup>, Anna Diez-Escudero <sup>2,\*</sup>, Ana Grzeszczak <sup>1</sup> and Cecilia Persson <sup>1,\*</sup>

<sup>1</sup> Division of Biomedical Engineering, Department of Materials Science and Engineering, The Ångström Laboratory, Uppsala University, Uppsala, Sweden;

<sup>2</sup> Ortholab, Department of Surgical Sciences, Rudbeck laboratory, Uppsala University, Uppsala, Sweden;

\* Correspondence: cecilia.persson@angstrom.uu.se; anna.diez@surgsci.uu.se

## Supplementary Materials

**Table S1.** Extrusion settings for each material.

| Sample          | Temperatures (°C) |          |          |          | Speed (rpm) | Fan speed (%) |
|-----------------|-------------------|----------|----------|----------|-------------|---------------|
|                 | Heater 4          | Heater 3 | Heater 2 | Heater 1 |             |               |
| 90PLA10PCL      | 170               | 185      | 190      | 180      | 5           | 70            |
| 80PLA20PCL      | 170               | 185      | 190      | 180      | 5           | 60            |
| 70PLA30PCL      | 140               | 155      | 160      | 160      | 6           | 60            |
| 90PLA10PCL-15HA | 170               | 185      | 180      | 175      | 5           | 70            |
| 80PLA20PCL-15HA | 170               | 185      | 190      | 180      | 5           | 70            |
| 70PLA30PCL-15HA | 140               | 155      | 160      | 160      | 6           | 60            |

**Table S2.** Thermal characteristics of all pristine samples investigated (before degradation) illustrating the glass transition temperature ( $T_g$ ), the cold crystallization temperature ( $T_{cc}$ ), the melting temperature ( $T_m$ ).

| Sample          | Temperature (°C) |          |       |
|-----------------|------------------|----------|-------|
|                 | $T_g$            | $T_{cc}$ | $T_m$ |
| PLA             | 59.9             | 133.7    | 152.6 |
| PCL             | -                | -        | 55.4  |
| 90PLA10PCL      | 52.5             | 121.2    | 147.6 |
| 80PLA20PCL      | 52.7             | 115.0    | 146.0 |
| 70PLA30PCL      | 53.3             | 116.4    | 145.7 |
| 90PLA10PCL-15HA | 52.9             | 114.9    | 146.4 |
| 80PLA20PCL-15HA | 53.5             | 111.7    | 144.8 |
| 70PLA30PCL-15HA | 54.5             | 122.6    | 146.3 |
